# Supplementary material
Source: PubMed Central journal article supplement (PMC2978738)
Supplement: ced0030-0525-s01.pdf [file ced0030-0525-s01.pdf]

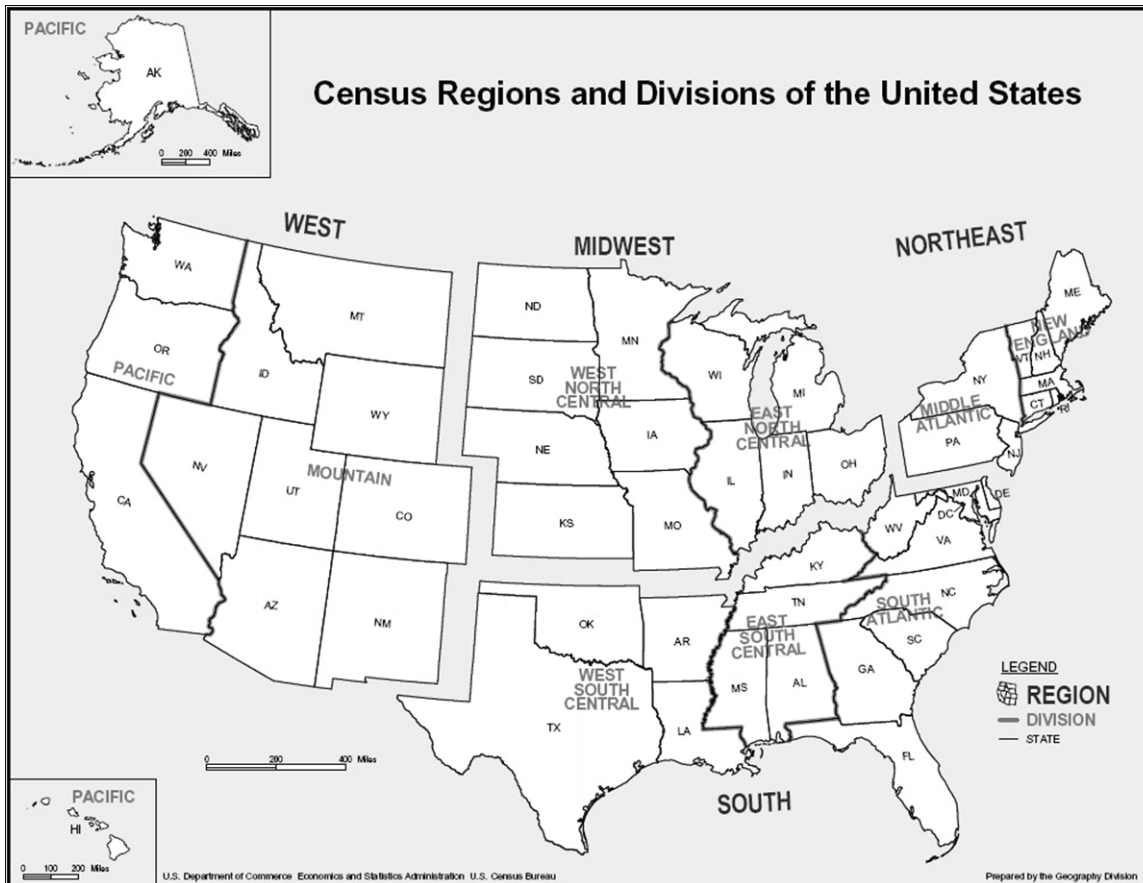

**New England:**

Connecticut  
Maine  
Massachusetts  
New Hampshire  
Rhode Island  
Vermont

**Middle Atlantic:**

New Jersey  
New York  
Pennsylvania

**East North Central:**

Indiana  
Illinois  
Michigan  
Ohio  
Wisconsin

**West North Central:**

Iowa  
Kansas  
Minnesota  
Missouri  
Nebraska  
North Dakota  
South Dakota

**South Atlantic:**

Delaware  
District of Columbia  
Florida  
Georgia  
Maryland  
North Carolina  
South Carolina  
Virginia  
West Virginia

**East South Central:**

Alabama  
Kentucky  
Mississippi  
Tennessee

**West South Central:**

Arkansas  
Louisiana  
Oklahoma  
Texas

**Mountain:**

Arizona  
Colorado  
Idaho  
New Mexico  
Montana  
Utah  
Nevada  
Wyoming

**Pacific:**

Alaska  
California  
Hawaii  
Oregon  
Washington

Figure A. Map of US Census Regions and Divisions

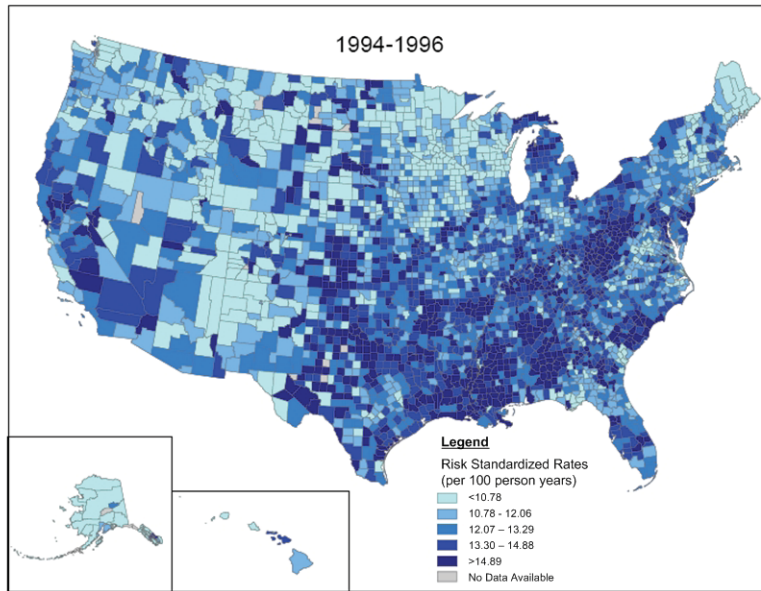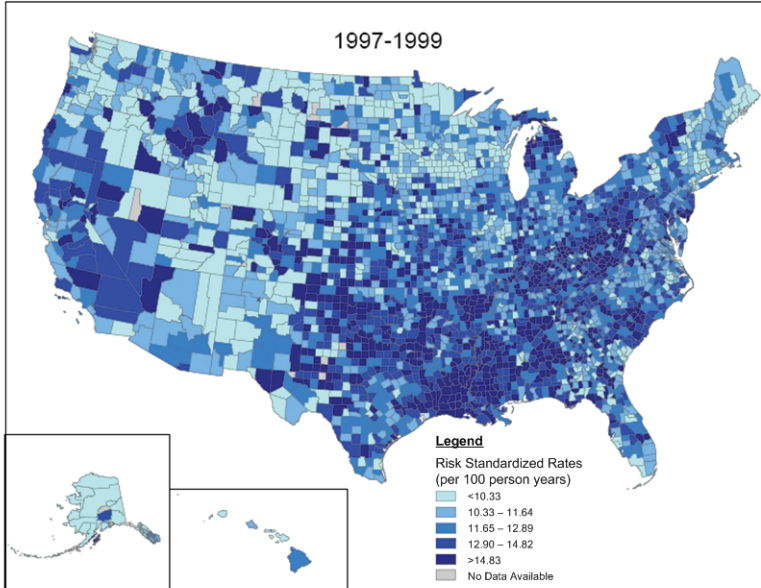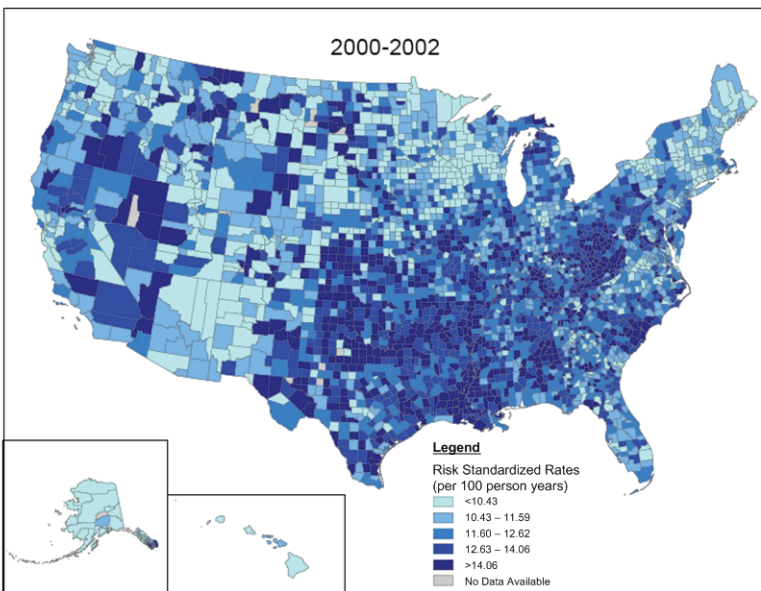

\*23 Counties Were Excluded Due to Percentage Errors greater than 20% for Risk-Standardized Rates at Any of the Time Periods

**Figure B.** One-Year Recurrent Stroke Rates by US County from 1994--2002
